# Supplementary material for: A novel triple-network hydrogel based on borate ester groups: from structural modulation to rapid wound hemostasis
Source: Royal Society of Chemistry journal article supplement (doi:10.1039/d2tb02537j), 2023-01-01
Supplement: d2tb02537j1.pdf [file d2tb02537j1.pdf]

## ***Supporting Information***

### **A Novel Triple Network Hydrogel Based on Borate Ester Groups: from Structural Modulation to Rapid Wound Hemostasis**

Nan Wang,<sup>a</sup> Kangkang Yu,<sup>\*b</sup> Kun Li,<sup>a</sup> and Xiaoqi Yu<sup>\*a, c</sup>

<sup>a</sup> Key Laboratory of Green Chemistry and Technology, Ministry of Education, College of Chemistry, Sichuan University, Chengdu, China 610064; \*E-mail: kangkangyu@scu.edu.cn;

<sup>b</sup> Key Laboratory of Bio-resources and Eco-environment, Ministry of Education, College of Life Sciences, Sichuan University, Chengdu, China, 610064

<sup>c</sup> Asymmetric Synthesis and Chiral technology Key Laboratory of Sichuan Province, Department of Chemistry, Xihua University, Chengdu, China, 610039; \*E-mail: xqyu@scu.edu.cn.

**Table S1.** Hydrogel formation corresponding to different guanosine (G) concentrations

| Groups             | 1        | 2        | 3        | 4        | 5         |
|--------------------|----------|----------|----------|----------|-----------|
| G (mg/mL)          | 3.33 (Q) | 5.71 (W) | 7.50 (R) | 8.89 (T) | 10.00 (Y) |
| Hydrogel formation | -        | +        | +        | +        | +         |

“-”: Hydrogel not formed; “+”: Hydrogel formed.

**Table S2.** Hydrogel formation at guanosine (G) concentration of 5.71 mg/mL

| Groups             | 1                                                       | 2   | 3   | 4   | 5   | 6   | 7   | 8   | 9   |
|--------------------|---------------------------------------------------------|-----|-----|-----|-----|-----|-----|-----|-----|
| Presolution A (μL) | 100                                                     | 200 | 300 | 400 | 500 | 600 | 700 | 800 | 900 |
| Precipitation of G | ++                                                      | ++  | +   | +   | +   | -   | -   | -   | -   |
| Hydrogel volume    | Presolution B is 400 μL and the total volume is 1400 μL |     |     |     |     |     |     |     |     |

“++”: a large amount of guanosine precipitation, and “+” : a small amount of G precipitation, and “-” : no G precipitation.

**Table S3.** Hydrogel formation at guanosine (G) concentration of 7.50 mg/mL

| Groups             | 1                                                       | 2   | 3   | 4   | 5   | 6   | 7   | 8   | 9   |
|--------------------|---------------------------------------------------------|-----|-----|-----|-----|-----|-----|-----|-----|
| Presolution A (μL) | 100                                                     | 200 | 300 | 400 | 500 | 600 | 700 | 800 | 900 |
| Precipitation of G | ++                                                      | ++  | ++  | +   | +   | +   | -   | -   | -   |
| Hydrogel volume    | Presolution B is 600 μL and the total volume is 1600 μL |     |     |     |     |     |     |     |     |

“++”: a large amount of guanosine precipitation, and “+”: a small amount of G precipitation, and “-”: no G precipitation.

**Table S4.** Hydrogel formation at guanosine (G) concentration of 8.89 mg/mL

| Groups                          | 1                                                                             | 2   | 3   | 4   | 5   | 6   | 7   | 8   | 9   |
|---------------------------------|-------------------------------------------------------------------------------|-----|-----|-----|-----|-----|-----|-----|-----|
| Presolution A ( $\mu\text{L}$ ) | 100                                                                           | 200 | 300 | 400 | 500 | 600 | 700 | 800 | 900 |
| Precipitation of G              | ++                                                                            | ++  | ++  | ++  | +   | +   | -   | -   | -   |
| Hydrogel volume                 | Presolution B is 800 $\mu\text{L}$ and the total volume is 1800 $\mu\text{L}$ |     |     |     |     |     |     |     |     |

“++”: a large amount of guanosine precipitation, and “+”: a small amount of G precipitation, and “-”: no G precipitation.

**Table S5.** Hydrogel formation at guanosine (G) concentration of 10.00 mg/mL

| Groups                          | 1                                                                              | 2   | 3   | 4   | 5   | 6   | 7   | 8   | 9   |
|---------------------------------|--------------------------------------------------------------------------------|-----|-----|-----|-----|-----|-----|-----|-----|
| Presolution A ( $\mu\text{L}$ ) | 100                                                                            | 200 | 300 | 400 | 500 | 600 | 700 | 800 | 900 |
| Precipitation of G              | ++                                                                             | ++  | ++  | ++  | ++  | ++  | +   | +   | -   |
| Hydrogel volume                 | Presolution B is 1000 $\mu\text{L}$ and the total volume is 2000 $\mu\text{L}$ |     |     |     |     |     |     |     |     |

“++”: a large amount of guanosine precipitation, and “+”: a small amount of G precipitation, and “-”: no G precipitation.

**Table S6.** Content and distribution of each element in the hydrogel *tri-BA@PVA/G*

| Relative percent elemental content (wt %) | W8    | R8    | T9    | Y8    |
|-------------------------------------------|-------|-------|-------|-------|
| <b>B</b>                                  | 20.68 | 20.35 | 19.13 | 20.55 |
| <b>C</b>                                  | 54.40 | 52.85 | 52.19 | 52.14 |

|    |       |       |       |       |
|----|-------|-------|-------|-------|
| N  | 1.88  | 2.81  | 3.48  | 4.70  |
| O  | 17.22 | 16.81 | 16.36 | 16.74 |
| Cl | 2.68  | 3.31  | 3.92  | 2.80  |
| K  | 3.15  | 3.88  | 4.93  | 3.07  |

**Table S7.** Wound healing data.

|         | Day 3 (g) | Day 3 (cm <sup>2</sup> ) | Healing rate (%) |
|---------|-----------|--------------------------|------------------|
| Control | 0.0043    | 2.5764                   | 4%               |
| Undried | 0.0034    | 2.0371                   | 24%              |

Notes: transparent sulfuric acid paper (10 cm × 10 cm), the mass of which is equal to ten randomly selected sheets for weighing and calculating the average value obtained : 0.1669g;

Wound area (cm<sup>2</sup>) = 100cm<sup>2</sup> × mass of paper sheet (wound size area)g / 0.1669g;

Healing rate (%) = (Original wound area - unhealed wound area) / original wound area × 100%;

Original wound area : Original trauma area: converted to 2.6962 cm<sup>2</sup>.

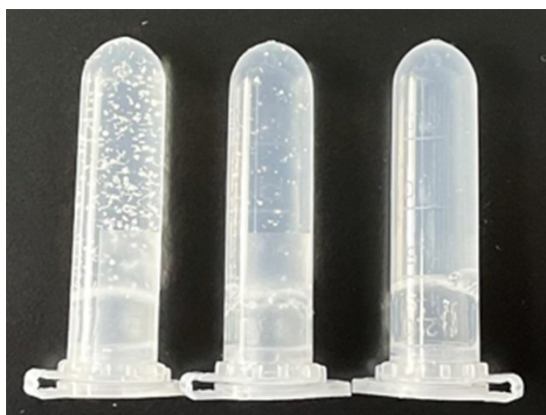

**Figure S1.** Images of guanosine in hydrogel *tri-BA@PVA/G*.

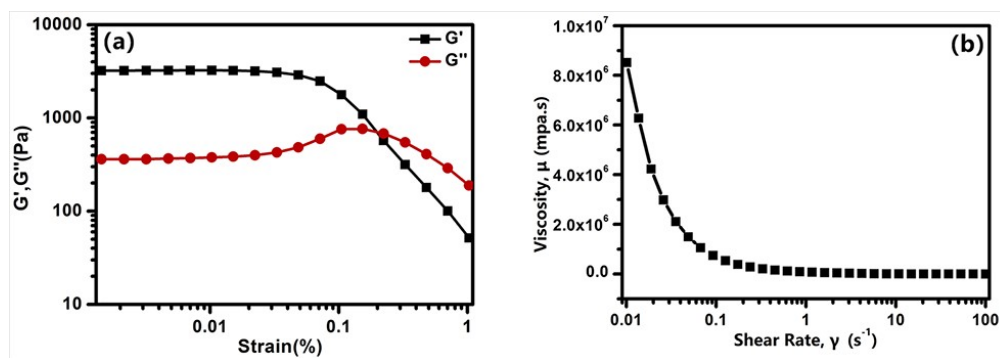

Figure S2. The rheological behavior of the hydrogel W8 as measured by (a) strain and (b) viscosity test.

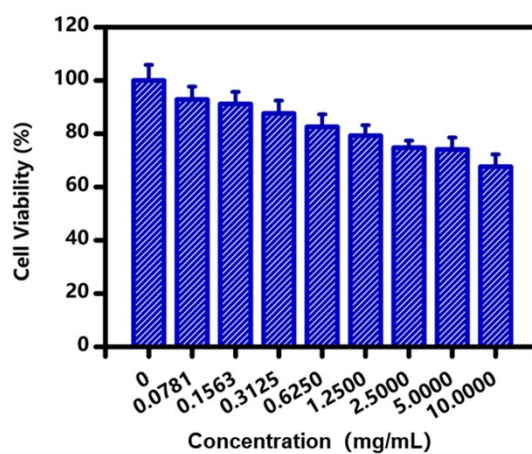

Figure S3. Cell viability of U87 cells after co-cultured with *tri*-BA@PVA/G extracts at different concentrations.

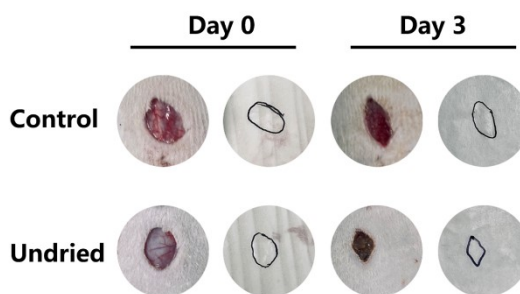

Figure S4. Photographs of wound healing in the control and hydrogel groups (Undried) at different healing times.
